# Supplementary material for: Neutrophil Extracellular Traps Impair Intestinal Barrier Function during Experimental Colitis
Source: PubMed Central journal article supplement (PMC7459452; doi:10.3390/biomedicines8080275), 2020-08-05
Supplement: biomedicines-08-00275-s001.pdf [file biomedicines-08-00275-s001.pdf]

# Neutrophil extracellular traps impair intestinal barrier function during experimental colitis

## Supplemental Document

Elliot Yi-Hsin Lin<sup>1</sup>, Hsuan-Ju Lai<sup>1</sup>, Yuan-Kai Cheng<sup>1</sup>, Kai-Quan Leong<sup>1</sup>, Li-Chieh Cheng<sup>1</sup>, Yi-Chun Chou<sup>2</sup>, Yu-Chun Peng<sup>1</sup>, Yi-Hsuan Hsu<sup>1</sup>, and Hao-Sen Chiang<sup>1,2\*</sup>

<sup>1</sup>Department of Life Science, National Taiwan University, Taipei, Taiwan

<sup>2</sup>Genome and Systems Biology Degree Program, National Taiwan University, Taipei, Taiwan

\*Corresponding author:

Hao-Sen Chiang, Ph.D.

R818 Life Science Building

1 Sec 4 Roosevelt Road

Taipei 10617, Taiwan

Phone: +886-2-3366-2454

Fax: +886-2-2363-6837

E-mail: [hschiang@ntu.edu.tw](mailto:hschiang@ntu.edu.tw)

| Gene name          | Primer sequences                                                                                               |
|--------------------|----------------------------------------------------------------------------------------------------------------|
| mouse <i>Il1b</i>  | Forward primer: 5'-TCA CAG CAG CAC ATC AAC AA-3'<br>Reverse primer: 5'-TGT CCT CAT CCT GGA AGG TC-3'           |
| mouse <i>Tnfa</i>  | Forward primer: 5'-TAG CCA GGA GGG AGA ACA GA-3'<br>Reverse primer: 5'-TTT TCT GGA GGG AGA TGT GG-3'           |
| mouse <i>Il17a</i> | Forward primer: 5'-CAG GAC GCG CAA ACA TGA-3'<br>Reverse primer: 5'-GCA ACA GCA TCA GAG ACA CAG AT-3'          |
| mouse <i>Ocln</i>  | Forward primer: 5'-TGG CAA GCG ATC ATA CCC AG-3'<br>Reverse primer: 5'-CCT CTT GCC CTT TCC TGC TT-3'           |
| mouse <i>Cldn1</i> | Forward primer: 5'-GAT GTG GAT GGC TGT CAT TG-3'<br>Reverse primer: 5'-CCT GGC CAA ATT CAT ACC TG-3'           |
| mouse <i>Tjp1</i>  | Forward primer: 5'-ACC CGA AAC TGA TGC TGT GGA TAG-3'<br>Reverse primer: 5'-AAA TGG CCG GGC AGA ACT TGT GTA-3' |
| mouse <i>Tbp</i>   | Forward primer: 5'-ACC GTG AAT CTT GGC TGT AAA C-3'<br>Reverse primer: 5'-GCA GCA AAT CGC TTG GGA TTA-3'       |
| bacterial 16S rDNA | Forward primer: 5'-CCA TGA AGT CGG AAT CGC TAG-3'<br>Reverse primer: 5'-ACT CCC ATG GTG TGA CGG-3'             |

**Supplemental Table 1. qPCR primers used in this study.**

## Plasma MPO-DNA

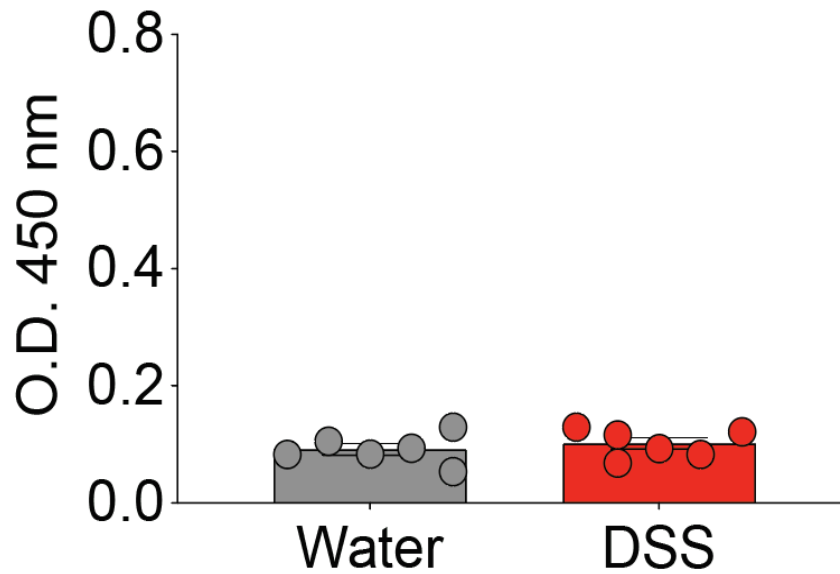

**Supplemental Figure 1. NET release was not detected in the plasma of DSS-induced colitis model in C57BL/6 mouse.** Colitis was induced by supplying 2.5% DSS in drinking water for 8 d. Mice that received water without DSS served as the controls ( $n=6$  mice per group). NET release was measured by using MPO-DNA ELISA.

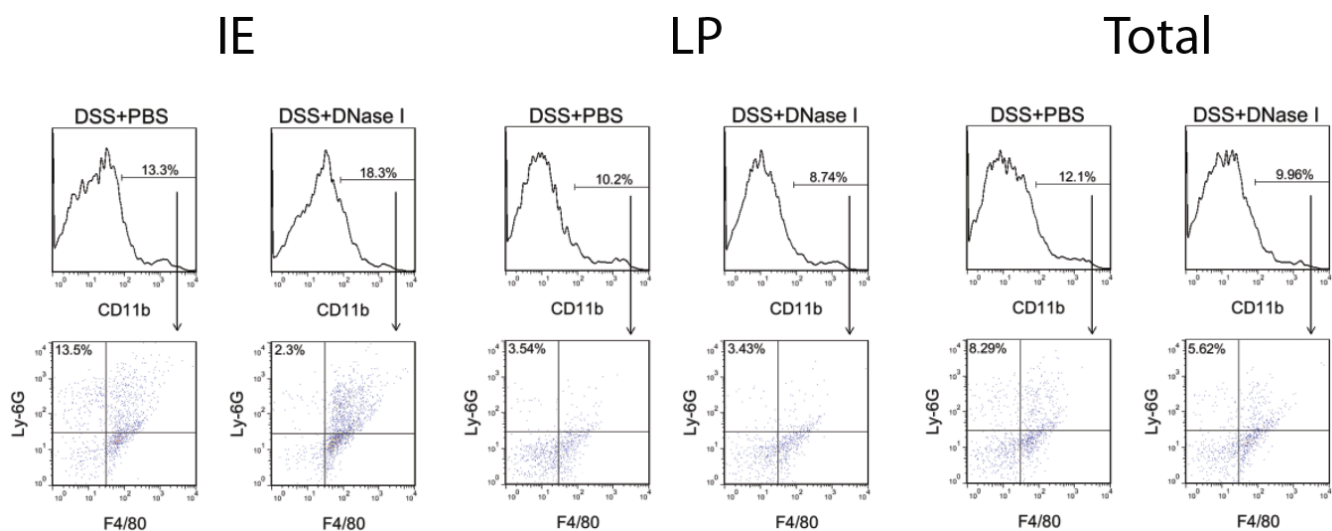

**Supplemental Figure 2. Flow cytometric analysis of intestinal epithelium cells (IE) or lamina propria cells (LP) isolated from the colon of DSS-induced colitis with PBS or DNase I treatment on day 8. Representative plots showing cells were initially gated on CD11b<sup>+</sup> cells followed by staining of antibodies against Ly6G and F4/80. CD11b<sup>+</sup>Ly6G<sup>+</sup>F4/80<sup>-</sup> cells were defined as neutrophils.**

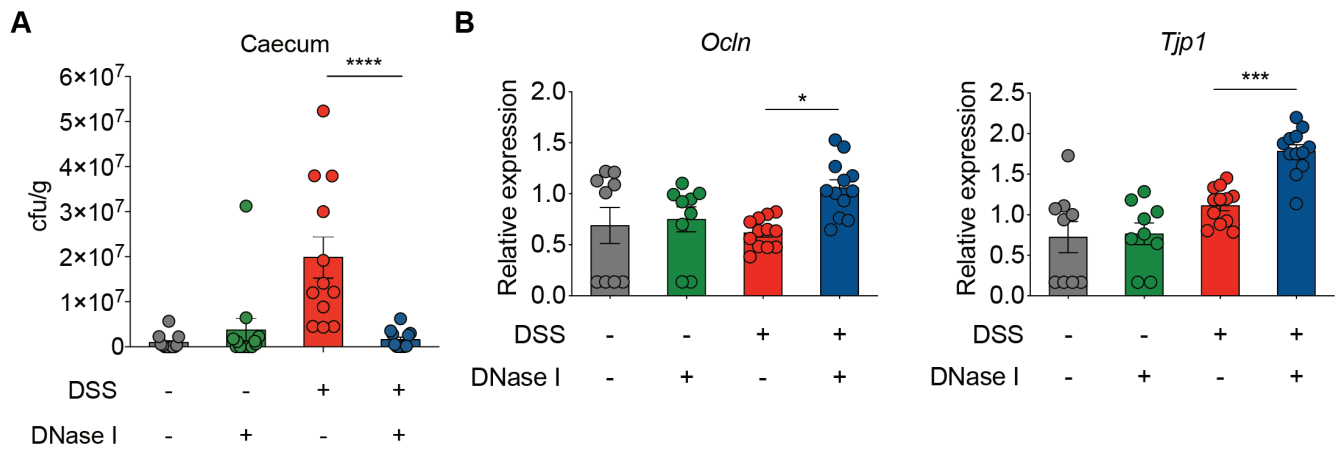

**Supplemental Figure 3. NETs alter intestinal barrier function and gene expression in the colon of DSS-treated mouse.** (A) Bacterial count in the cecum of control or DSS mice treated with PBS or DNase I were determined on day 8. Results are pooled data from three separate experiments.  $n=12$  mice per control groups and  $n=12$  mice per DSS groups. (B) Quantitative RT-PCR analysis of occluding (*Ocln*) and ZO-1 (*Tjp1*) mRNA levels in the colon of control and DSS mice treated with PBS or DNase I. Values are normalized to the expression of *Tbp*. Results are pooled data from two separate experiments.  $n=9$  mice per control groups and  $n=12$  mice per DSS groups.
